# Supplementary material for: An H2S-activated ratiometric CO photoreleaser enabled by excimer/monomer conversion
Source: Royal Society of Chemistry journal article supplement (doi:10.1039/c9cc02352f), 2019-01-01
Supplement: c9cc02352f1.pdf [file c9cc02352f1.pdf]

## Supporting information

### **A H<sub>2</sub>S-activated Ratiometric CO Photoreleaser Enabled by Excimer/Monomer Conversion**

Yong Li,<sup>†</sup> Yingzheng Shu,<sup>†</sup> Xu Wang,<sup>\*</sup> Xiaoyun Jiao, Xilei Xie, Jian Zhang and Bo Tang<sup>\*</sup>

*College of Chemistry, Chemical Engineering and Materials Science, Collaborative Innovation Center of Functionalized Probes for Chemical Imaging in Universities of Shandong, Key Laboratory of Molecular and Nano Probes, Ministry of Education, Shandong Provincial Key Laboratory of Clean Production of Fine Chemicals, Shandong Normal University, Jinan 250014, P. R. China*

E-mail: tangb@sdsu.edu.cn, wangxu@sdsu.edu.cn

## 1. Materials and Instruments

All reagents for synthesis were purchased from commercial suppliers and were used without further purification unless otherwise stated. Pyrene-1-carboxaldehyde was bought from J&K Scientific Ltd. N-(3-acetyl-4-hydroxyphenyl) butyramide was purchased from Adamas Reagent, Ltd. Rat TNF- $\alpha$  ELISA Kit (EK0526) and Rat IL-6 ELISA Kit (EK0412) were obtained from Boster Biological Technology Co., Ltd. Endogenous carbon monoxide (CO) assay kit (A101-3) was acquired from Nanjing Jiancheng Bioengineering Institute.

PFN was dissolved in DMSO to prepare a 1 mM stock solution and the ultimate experimental content of DMSO was 1% (v/v). pH measurements were performed with a pH-3c digital pH-meter (Shanghai Lei Ci Device Works, Shanghai, China). Absorption spectra were recorded on a UV-1700 spectrophotometer (Shimadzu, Japan). Fluorescence spectra were obtained with a FLS-980 fluorescence spectrometer (Edinburgh Instruments Ltd., England). HPLC analysis was carried out on a Shimadzu LC-16 system equipped with SPD-16 UV-vis detector. The CO release in buffer solution and cell was irradiated with a CEL-HXF300 Xenon lamp with power 5 mW/cm<sup>2</sup> at 360 nm. <sup>1</sup>H NMR and <sup>13</sup>C NMR spectra were taken on a 400 MHz spectrometer (Bruker Co., Ltd., Germany),  $\delta$  values are in *ppm* relative to TMS. HRMS spectra were obtained on a maxis ultra-high resolution-TOF MS system (Bruker Co., Ltd., Germany). MTT assay was performed using a TRITURUS microplate reader. The confocal fluorescence images of cells were gained on a TCS SP8 Confocal Laser Scanning Microscope (Leica Co., Ltd., Germany).

## 2. Synthetic procedures and characterization details

### Synthesis of Compound PF

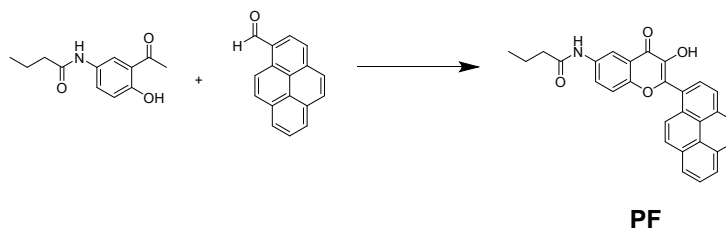

The mixture of N-(3-acetyl-4-hydroxyphenyl)butyramide (0.211 g, 1.0 mM) and pyrene-1-carboxaldehyde (0.23 g, 1.0 mM) in 10 mL of EtOH was cooled to 0 °C and then added 5 mL of sodium hydroxide aqueous solution (20%). After that, the reaction solution was heated to 40 °C for 5 h. Then hydrogen peroxide (5.0 ml, 30%) was added dropwise while on ice. The mixture was stirred for another 12 h at room temperature followed by acidified to pH=6.5 with 0.5 M HCl. Finally, the suspension was filtered and resulting residue was purified by silica chromatography eluted with CH<sub>2</sub>Cl<sub>2</sub>/ CH<sub>3</sub>OH (50:1, v/v) to afford compound **PF** as a yellow solid (0.30 g, 67% yield). <sup>1</sup>H NMR (400 MHz, DMSO-*d*<sub>6</sub>) δ 10.26 (s, 1H), 9.28 (s, 1H), 8.62 (s, 1H), 8.46 – 8.25 (m, 7H), 8.15 (t, *J* = 7.6 Hz, 1H), 8.09 (d, *J* = 9.2 Hz, 1H), 7.94 (dd, *J* = 8, 4 Hz, 1H), 7.68 (d, *J* = 9.2 Hz, 1H), 2.38 (t, *J* = 8 Hz, 2H), 1.68 (sext, *J* = 8 Hz, 2H), 0.97 (t, *J* = 8 Hz, 3H). <sup>13</sup>C NMR (101 MHz, DMSO-*d*<sub>6</sub>) δ 173.20, 171.91, 151.87, 148.09, 139.83, 136.54, 132.45, 131.13, 130.66, 129.15, 128.92, 128.82, 128.38, 127.72, 127.13, 126.54, 126.37, 126.09, 125.98, 125.44, 125.02, 124.21, 124.03, 122.76, 119.52, 113.43, 38.81, 19.01, 14.14. HRMS(ESI) (*m/z*): calculated for C<sub>29</sub>H<sub>21</sub>NO<sub>4</sub> [M+H]<sup>+</sup> 448.1543, found 448.1609; [M+Na]<sup>+</sup> 470.1362, found 470.1432.

### Synthesis of Compound PFN

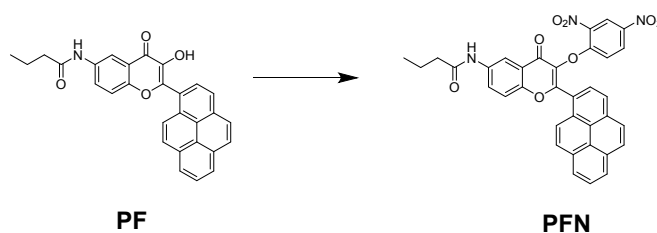

The mixture of compound **PF** (0.09 g, 0.20 mM) and anhydrous K<sub>2</sub>CO<sub>3</sub> (0.08 g, 0.58 mM) in 3.0 mL of DMF was stirred at room temperature. After 10 min, 2,4-

dinitrofluorobenzene (0.05 g, 0.25 mM) was added, and the resulting mixture was stirred for another 2 h. The residue was purified by silica chromatography eluted with CH<sub>2</sub>Cl<sub>2</sub>/ CH<sub>3</sub>OH (100:1, v/v) to afford compound **PFN** as an orange solid (0.10 g, 80% yield). <sup>1</sup>H NMR (400 MHz, DMSO-*d*<sub>6</sub>) δ 10.37 (s, 1H), 8.56 (dd, *J* = 21.2, 2.5 Hz, 2H), 8.46 – 8.21 (m, 9H), 8.17 (t, *J* = 7.6 Hz, 1H), 8.10 (dd, *J* = 9.1, 2.2 Hz, 1H), 7.85 (t, *J* = 8.4 Hz, 2H), 2.38 (t, *J* = 7.3 Hz, 2H), 1.67 (sext, *J* = 8 Hz, 2H), 0.96 (t, *J* = 7.3 Hz, 3H). <sup>13</sup>C NMR (101 MHz, DMSO-*d*<sub>6</sub>) δ 172.08, 171.57, 159.22, 154.08, 152.36, 141.69, 138.20, 137.57, 136.05, 133.19, 131.02, 130.59, 129.81, 129.55, 129.33, 129.22, 127.72, 127.57, 127.37, 126.92, 126.79, 126.66, 124.99, 124.73, 123.98, 123.75, 123.38, 121.88, 119.91, 118.23, 113.64, 38.80, 18.96, 14.05. HRMS(ESI) (m/z): calculated for C<sub>35</sub>H<sub>23</sub>N<sub>3</sub>O<sub>8</sub> [M+H]<sup>+</sup> 614.1557, found 614.1559; [M+Na]<sup>+</sup> 636.1377, 636.1375.

### 3. MTT assay

The MTT assays were carried out to test the cytotoxicity of **PFN** and **PF**. The IEC-6 cells were replanted in the 96-well micro plates to a total volume of 200 μL well<sup>-1</sup>. Then, the plates were maintained at 37°C, 5% CO<sub>2</sub>/95% air incubator for 24 hours. The cells were then treated with different concentrations **PFN** and **PF** (0, 10, 25, 50 and 100 μM) for another 12 hours. Subsequently, the culture was removed and MTT solution (5.0 mg ml<sup>-1</sup>) was added to each well. After 4 hours, the remaining MTT solution was removed and 50 μL DMSO was added into each well to dissolve the formazan crystals. The absorbance of solution was measured at 490 nm with 10 min gentle agitation using a TRITURUS microplate reader. According to the method of Huber and Koella, the IC<sub>50</sub> values of **PFN** and **PF** were calculated to be 92.47 μM and 105.26 μM, respectively. To assess the cytotoxicity of photolysis products of **P**, the MTT assay was performed upon irradiation on **PF** for different periods of time (0, 3, 6, 9, 12 min) utilizing a CEL-HXF300 Xenon lamp with power 5 mW/cm<sup>2</sup> at 360 nm.

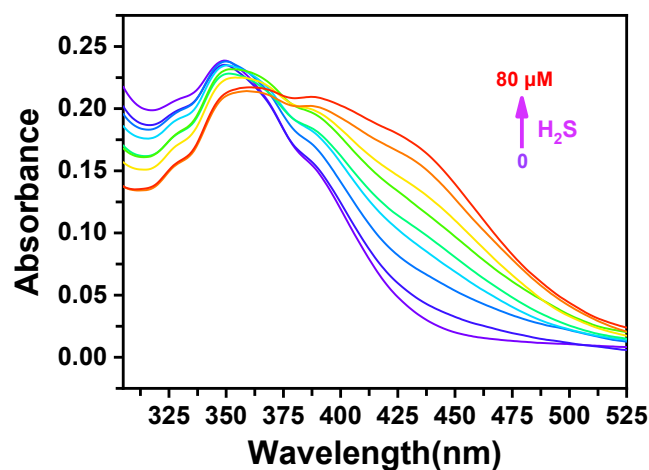

**Fig. S1** Absorption spectra changes of PFN (10.0 μM) with increased concentration (0–80 μM) of H<sub>2</sub>S in PBS buffer (50 mM, pH 7.4, containing 300 μM CTAB).

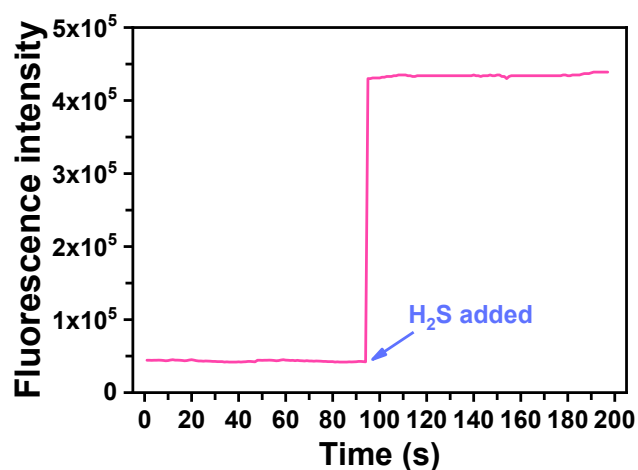

**Fig. S2** Time-dependent fluorescence changes of PFN (10 μM) toward H<sub>2</sub>S (25 μM) in PBS buffer (50 mM, pH 7.4, containing 300 μM CTAB) at 37 °C.  $\lambda_{\text{ex}}/\lambda_{\text{em}} = 360 \text{ nm} / 490 \text{ nm}$ . Slit width: 5 nm / 5 nm.

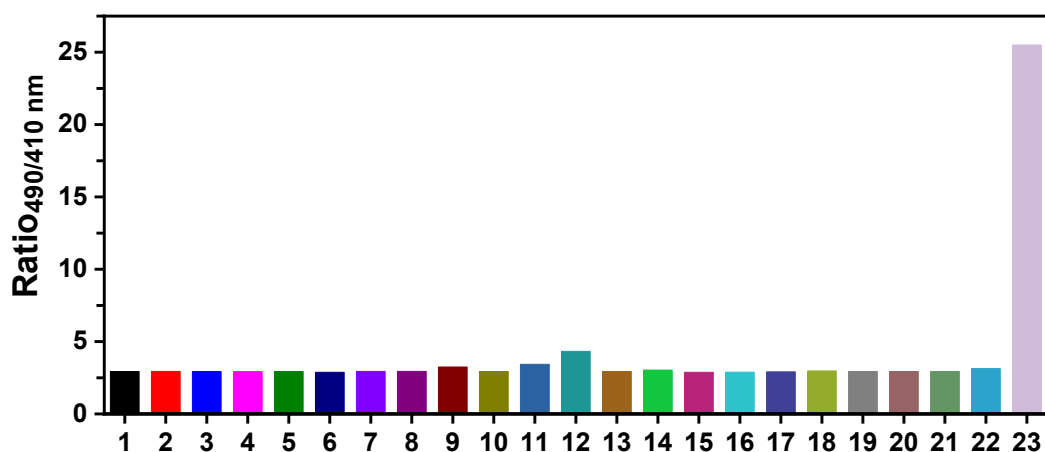

**Fig. S3** The specificity of PFN (10 μM) towards various bioanalytes: 1. Blank; 2. H<sub>2</sub>O<sub>2</sub>; 3. ClO<sup>-</sup>; 4. <sup>1</sup>O<sub>2</sub>; 5. OH<sup>-</sup>; 6. O<sub>2</sub><sup>-</sup>; 7. NO; 8. ONOO<sup>-</sup>; 9. SO<sub>3</sub><sup>2-</sup>; 10. Hcy; 11. Cys; 12. GSH; 13. Vc; 14. Fe<sup>2+</sup>; 15. Ca<sup>2+</sup>; 16. Cu<sup>2+</sup>; 17. F<sup>-</sup>; 18. Cl<sup>-</sup>; 19. CO<sub>3</sub><sup>2-</sup>; 20. NO<sub>3</sub><sup>-</sup>; 21. HSO<sub>3</sub><sup>-</sup>; 22. SO<sub>4</sub><sup>2+</sup>; 23. H<sub>2</sub>S (40 μM). The concentrations of GSH, Hcy, and Cys were 1.0 mM, and the other substances were 100 μM unless otherwise stated. The results were obtained in PBS buffer (50 mM, pH 7.4, containing 300 μM CTAB). λ<sub>ex</sub> = 360 nm. Slit width: 5 nm / 5 nm.

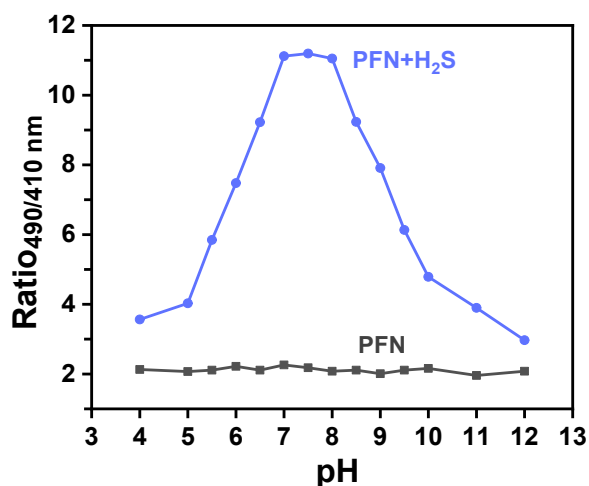

**Fig. S4** The fluorescence ratiometric changes of PFN (10 μM) as the H<sub>2</sub>S (15 μM) addition under different pH values (4.0, 5.0, 5.5, 6.0, 6.5, 7.0, 7.4, 8.0, 8.5, 9.0, 9.5, 10, 11, 12) by using universal buffer solution (0.1 mM citric acid, 0.1 M KH<sub>2</sub>PO<sub>4</sub>, 0.1 M Na<sub>2</sub>B<sub>4</sub>O<sub>7</sub>, 0.1 M Tris, 0.1 M KCl, containing 300 μM CTAB). λ<sub>ex</sub> = 360 nm. Slit width: 5 nm / 5 nm.

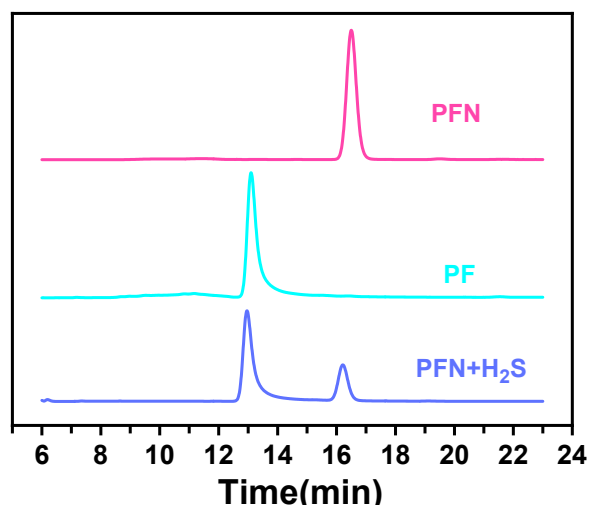

**Fig. S5** HPLC chromatograms of **PFN**, **PF**, and **PFN** incubated with 10 equiv of  $\text{H}_2\text{S}$ . Chromatographic separation was performed on a ZORBAX Eclipse Plus C18 reversed-phase column ( $4.6 \times 250$  mm,  $5 \mu\text{m}$ ). The mobile phase was a mixture of water and methanol (10/90, v/v) delivered at a flow rate of 1.0 mL/min. The detection wavelength was set at 360 nm.

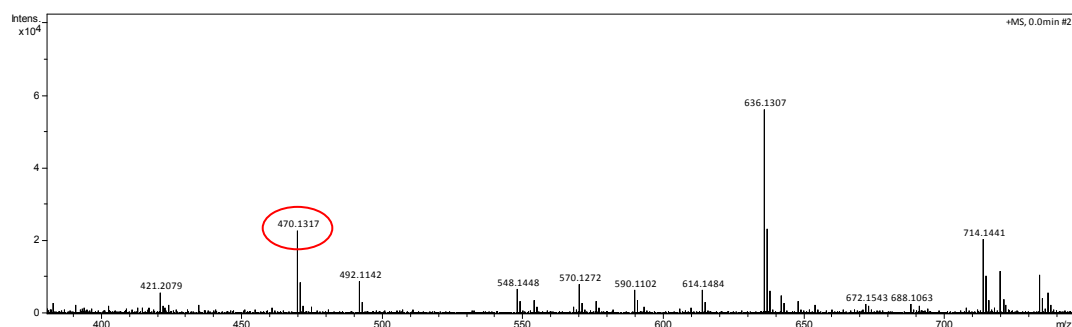

**Fig. S6** HRMS spectral analysis of reaction between **PFN** and  $\text{H}_2\text{S}$ . The peak appeared at  $m/z$  470.1317  $[\text{M} + \text{Na}]^+$  was corresponding to the reaction product **PF**.

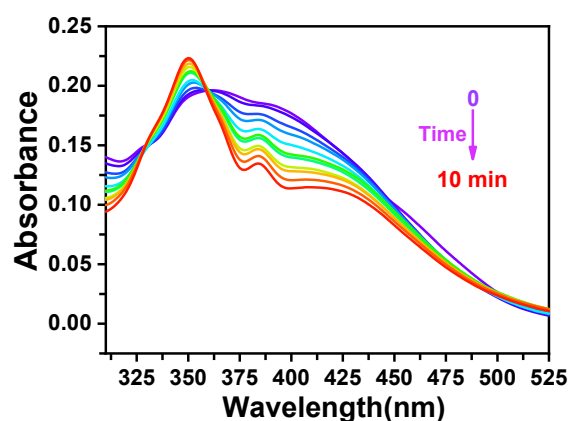

**Fig. S7** Absorption spectra changes of PFN (10  $\mu\text{M}$ ) treated with  $\text{H}_2\text{S}$  (100  $\mu\text{M}$ ) during irradiation ( $\lambda = 365 \text{ nm}$ , CEL-HXF300 Xenon lamp with power  $5 \text{ mW/cm}^2$ ). The data was recorded every 1.0 min in PBS buffer (50 mM, pH 7.4, containing 300  $\mu\text{M}$  CTAB).

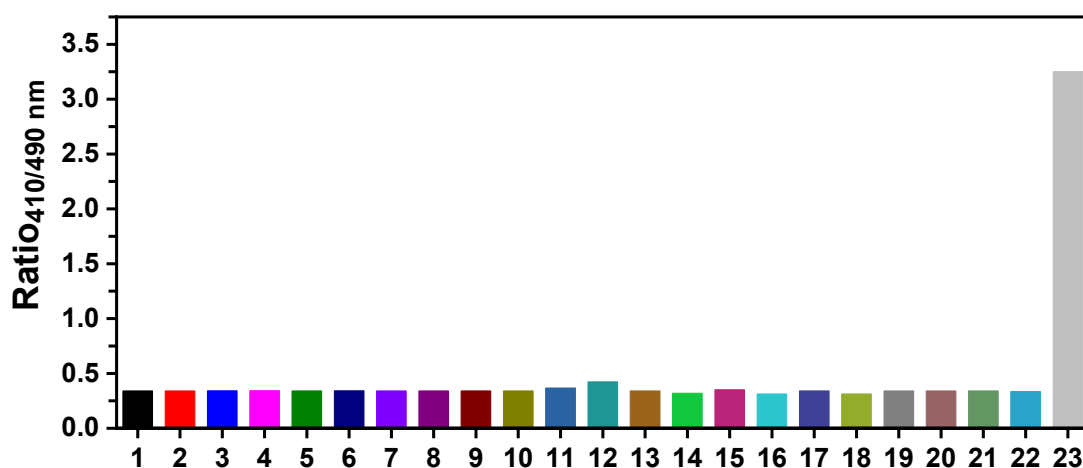

**Fig. S8** The fluorescent ratio changes of PFN (10  $\mu\text{M}$ ) treated with various biological substances after 10 min irradiation ( $\lambda = 365 \text{ nm}$ , CEL-HXF300 Xenon lamp with power  $5 \text{ mW/cm}^2$ ): 1, Blank; 2,  $\text{H}_2\text{O}_2$ ; 3,  $\text{ClO}^-$ ; 4,  $^1\text{O}_2$ ; 5,  $\text{OH}^\cdot$ ; 6,  $\text{O}_2^{\cdot-}$ ; 7,  $\text{ON}^\cdot$ ; 8,  $\text{ONOO}^-$ ; 9,  $\text{SO}_3^{2-}$ ; 10, Hcy; 11, Cys; 12, GSH; 13, Vc; 14,  $\text{Fe}^{2+}$ ; 15,  $\text{Ca}^{2+}$ ; 16,  $\text{Cu}^{2+}$ ; 17,  $\text{F}^-$ ; 18,  $\text{Cl}^-$ ; 19,  $\text{CO}_3^{2-}$ ; 20,  $\text{NO}_3^-$ ; 21,  $\text{HSO}_3^-$ ; 22,  $\text{SO}_4^{2+}$ ; 23,  $\text{H}_2\text{S}$ . The concentrations of GSH, Hcy, and Cys were 1.0 mM, and the other substances were 100  $\mu\text{M}$ . The results were obtained in PBS buffer (50 mM, pH 7.4, containing 300  $\mu\text{M}$  CTAB).  $\lambda_{\text{ex}} = 360 \text{ nm}$ . Slit width: 5 nm / 5 nm.



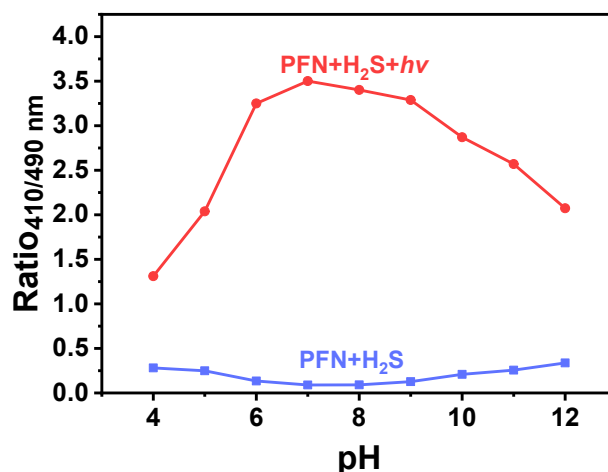

**Fig. S9** The photoinduced fluorescence ratio changes of **PFN** (10  $\mu\text{M}$ ) with  $\text{H}_2\text{S}$  (100  $\mu\text{M}$ ) under different pH values (4.0, 5.0, 5.5, 6.0, 6.5, 7.0, 7.4, 8.0, 8.5, 9.0, 9.5, 10, 11) by using universal buffer solution (0.1 mM citric acid, 0.1 M  $\text{KH}_2\text{PO}_4$ , 0.1 M  $\text{Na}_2\text{B}_4\text{O}_7$ , 0.1 M Tris, 0.1 M KCl, 0.3 M CTAB). The results were collected after 10 min irradiation ( $\lambda = 365$  nm, CEL-HXF300 Xenon lamp with power 5  $\text{mW}/\text{cm}^2$ ).  $\lambda_{\text{ex}} = 360$  nm. Slit width: 5 nm /5 nm.

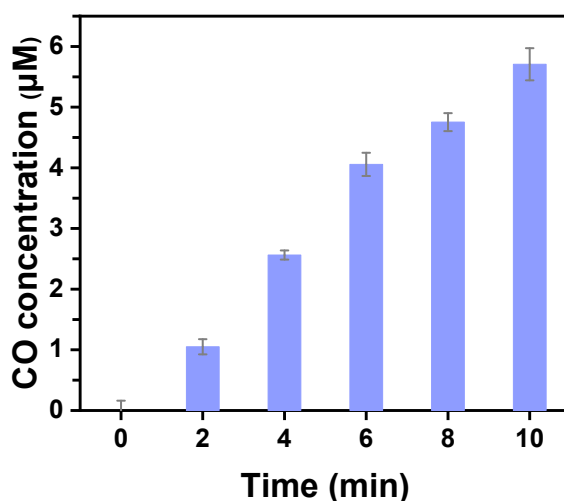

**Fig. S10** The  $\text{H}_2\text{S}$ -mediated photoinduced releasing during irradiation ( $\lambda = 365$  nm, CEL-HXF300 Xenon lamp with power 5  $\text{mW}/\text{cm}^2$ ). The solution of **PFN** (10  $\mu\text{M}$ ) with  $\text{H}_2\text{S}$  (100  $\mu\text{M}$ ) in PBS buffer (50 mM, pH 7.4, containing 300  $\mu\text{M}$  CTAB) was irradiated for different periods of time followed by analysed with CO ELISA assay kit.

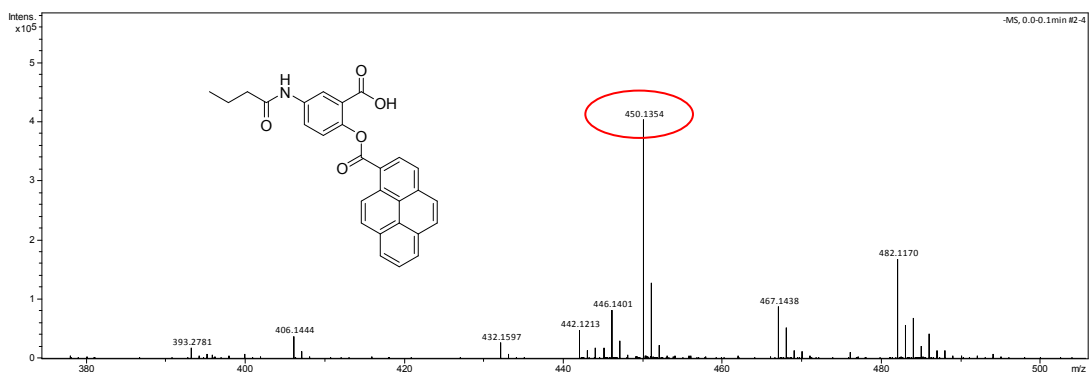

**Fig. S11** HRMS spectral analysis of the photolysis of **PF**. The probe **PFN** (10  $\mu$ M) was incubated with  $H_2S$  (100  $\mu$ M) and then irradiated with 365 nm light (CEL-HXF300 Xenon lamp with power 5  $mW/cm^2$ ) for 10 min. After that, the mixture was characterized by HRMS spectrometry.

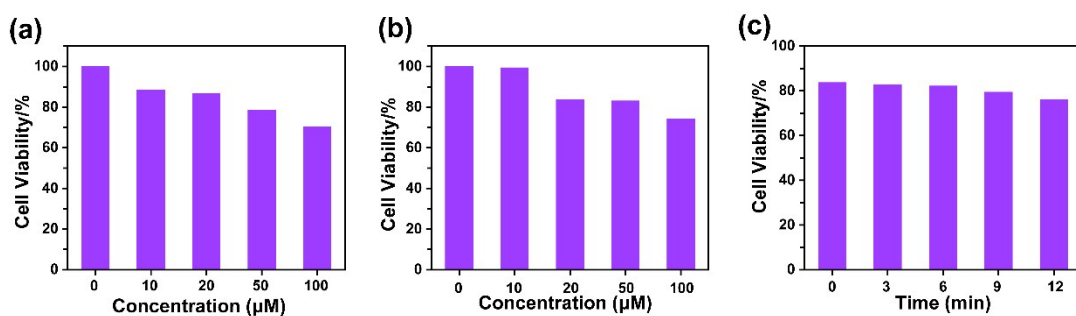

**Fig. S12** MTT assays of **PFN** (a), **PF** (b) and **PF** (100  $\mu$ M) under irradiation for different time periods (c) (CEL-HXF300 Xenon lamp with power 5  $mW/cm^2$ ).

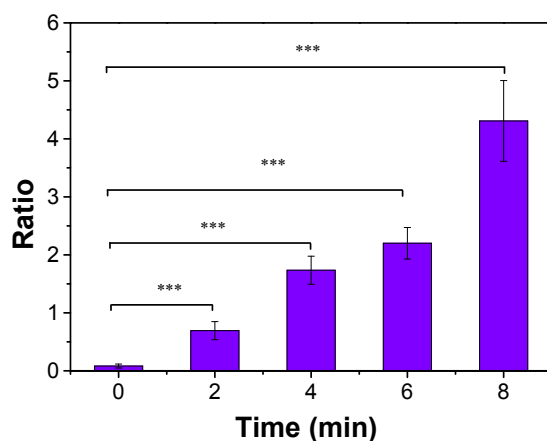

**Fig. S13** The ratiometric changes of 10  $\mu$ M **PFN** in 1.0  $\mu$ g/mL LPS-loaded IEC-6 cells during irradiation ( $\lambda = 365$  nm, CEL-HXF300 Xenon lamp with power 5  $mW/cm^2$ ). The ratio readout was derived from Fig. 5. The values are the mean $\pm$ s.d. for n=3, \*\*\*p<0.001.

# NMR spectra

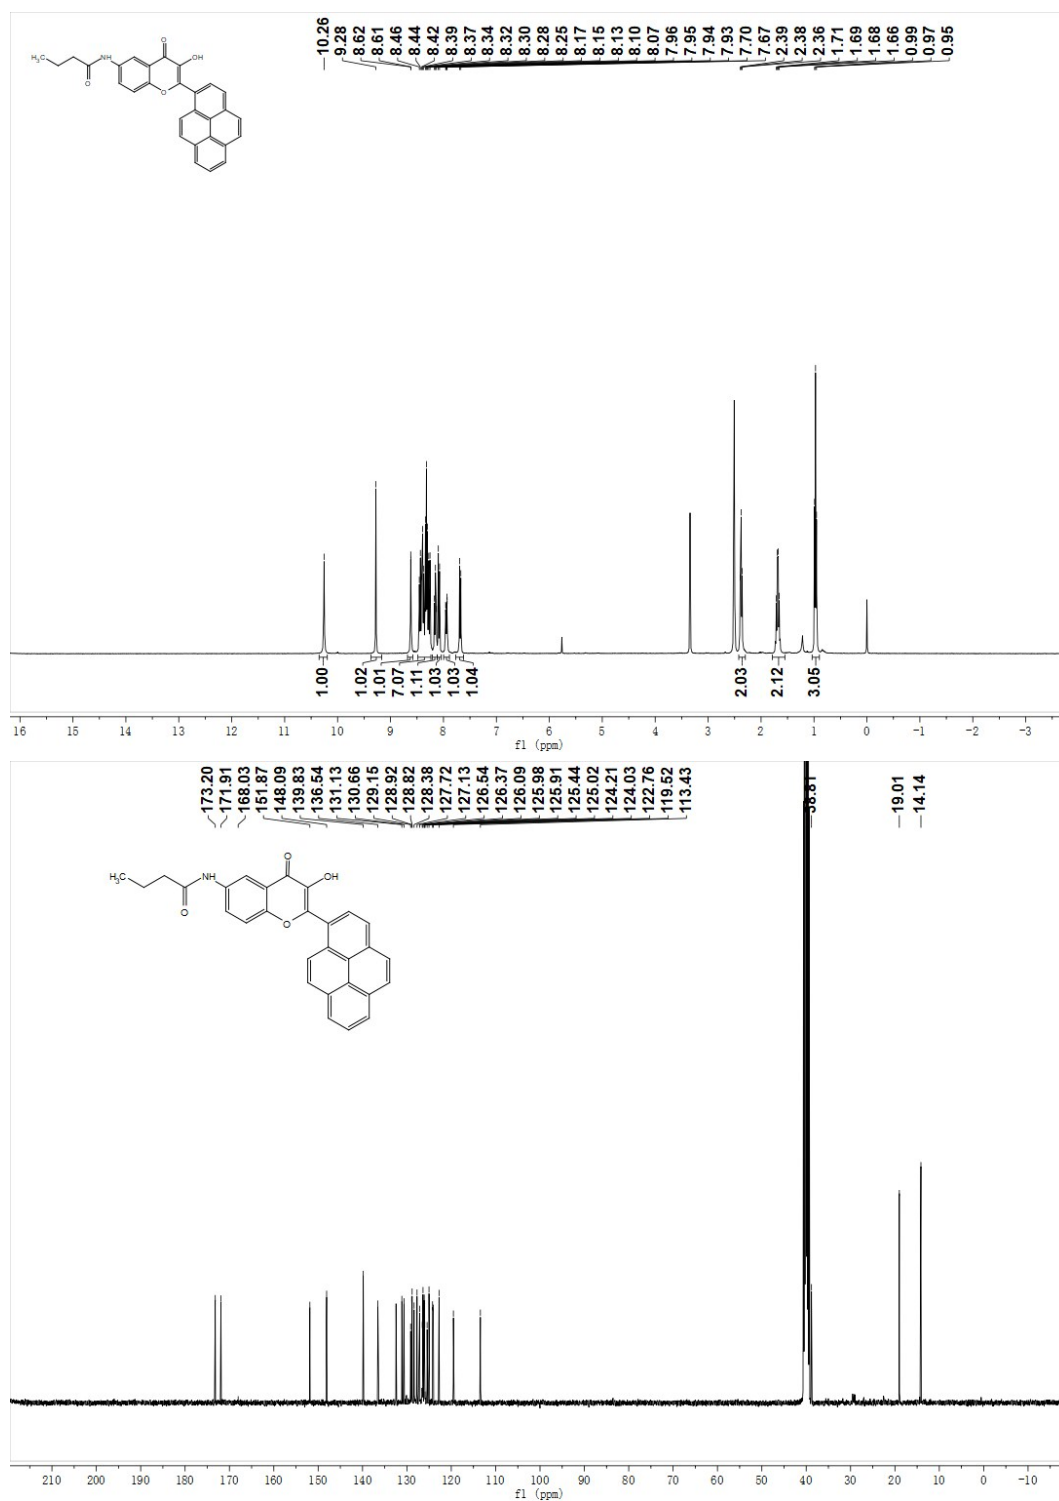

**Fig. S14** <sup>1</sup>H and <sup>13</sup>C NMR spectra of compound PF (DMSO-*d*<sub>6</sub>).

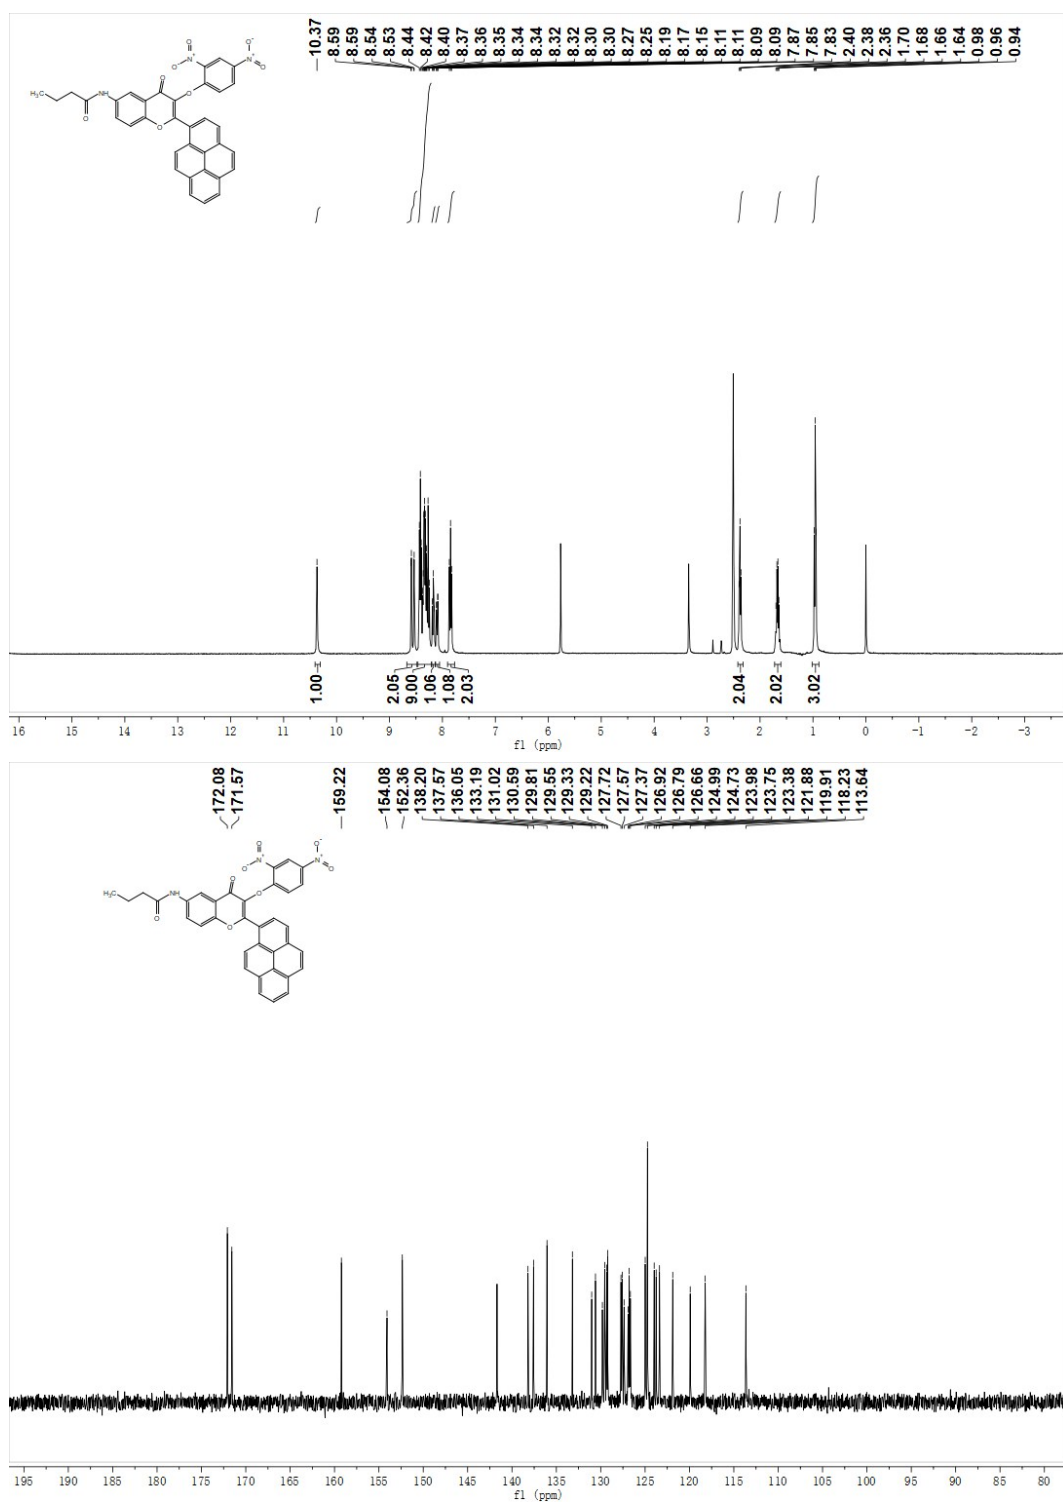

**Fig. S15** <sup>1</sup>H and <sup>13</sup>C NMR spectra of compound **PFN** (DMSO-*d*<sub>6</sub>).
